# Supplementary material for: What defines electrophilicity in carbonyl compounds
Source: Royal Society of Chemistry journal article supplement (doi:10.1039/d3sc05595g), 2024-01-01
Supplement: d3sc05595g1.pdf [file d3sc05595g1.pdf]

# What defines electrophilicity in carbonyl compounds

F. Matthias Bickelhaupt,<sup>\*,a</sup> Israel Fernández<sup>\*,b</sup>

a Department of Chemistry and Pharmaceutical Sciences, AIMMS, Vrije Universiteit Amsterdam, The Netherlands. Institute for Molecules and Materials (IMM), Radboud University, Nijmegen, The Netherlands. Department of Chemical Sciences, University of Johannesburg, South Africa. E-mail: f.m.bickelhaupt@vu.nl

b Departamento de Química Orgánica and Centro de Innovación en Química Avanzada (ORFEO-CINQA). Facultad de Ciencias Químicas, Universidad Complutense de Madrid Ciudad Universitaria, 28040-Madrid, Spain. E-mail: israel@quim.ucm.es

## Contents:

1. Cartesian coordinates and energies.....

Cartesian coordinates (in Å) and total energies (in a.u., noncorrected ZVPE included) of all the stationary points discussed in the text. All calculations have been performed at the M06-2X/6-311+G\* level.

**1-CH2:** E= -309.672580

|   |              |              |              |
|---|--------------|--------------|--------------|
| C | -1.075964746 | 0.100167117  | 0.000000000  |
| C | -0.313242819 | 0.387342776  | 1.279380000  |
| C | 1.065102558  | -0.292234474 | 1.259683000  |
| C | 1.848321517  | 0.078874561  | 0.000000000  |
| C | 1.065102558  | -0.292234474 | -1.259683000 |
| C | -0.313242819 | 0.387342776  | -1.279380000 |
| H | -0.919977037 | 0.067845271  | 2.127187000  |
| H | -0.174822407 | 1.473705998  | 1.349963000  |
| H | 1.623258815  | -0.016121957 | 2.157542000  |
| H | 0.929602112  | -1.378949017 | 1.295446000  |
| H | 2.819730769  | -0.422367863 | 0.000000000  |
| H | 2.049837861  | 1.157239534  | 0.000000000  |
| H | 1.623258815  | -0.016121957 | -2.157542000 |
| H | 0.929602112  | -1.378949017 | -1.295446000 |
| H | -0.919977037 | 0.067845271  | -2.127187000 |
| H | -0.174822407 | 1.473705998  | -1.349963000 |
| O | -2.198169894 | -0.341794635 | 0.000000000  |

**1-NMe:** E= -364.983851

|   |              |              |              |
|---|--------------|--------------|--------------|
| C | 0.137107000  | -0.859512000 | 1.197234000  |
| C | 0.137107000  | 0.686898000  | 1.269806000  |
| C | 0.736120000  | 1.252945000  | 0.000000000  |
| C | 0.137107000  | 0.686898000  | -1.269806000 |
| C | 0.137107000  | -0.859512000 | -1.197234000 |
| N | -0.495698000 | -1.389700000 | 0.000000000  |
| H | -0.361114000 | -1.275263000 | 2.075736000  |
| H | 1.172781000  | -1.213624000 | 1.217280000  |
| H | 0.704895000  | 1.048496000  | 2.128006000  |
| H | -0.893307000 | 1.048054000  | 1.363225000  |
| O | 1.647355000  | 2.043811000  | 0.000000000  |
| H | 0.704895000  | 1.048496000  | -2.128006000 |
| H | -0.893307000 | 1.048054000  | -1.363225000 |
| H | -0.361114000 | -1.275263000 | -2.075736000 |
| H | 1.172781000  | -1.213624000 | -1.217280000 |
| C | -1.942585000 | -1.258386000 | 0.000000000  |
| H | -2.348627000 | -1.756743000 | -0.882291000 |
| H | -2.348627000 | -1.756743000 | 0.882291000  |
| H | -2.309992000 | -0.220400000 | 0.000000000  |

**1-C(O2C2H4):** E= -537.462334

|   |              |              |              |
|---|--------------|--------------|--------------|
| C | -0.238209000 | 1.181354000  | -0.700706000 |
| C | -1.509412000 | 1.304860000  | 0.148660000  |
| C | -2.306173000 | 0.013067000  | 0.151009000  |
| C | -1.503869000 | -1.230387000 | 0.485997000  |
| C | -0.245455000 | -1.319542000 | -0.385985000 |

|   |              |              |              |
|---|--------------|--------------|--------------|
| C | 0.576954000  | -0.040728000 | -0.296286000 |
| H | 0.387378000  | 2.070575000  | -0.591073000 |
| H | -0.488087000 | 1.088311000  | -1.761525000 |
| H | -2.152595000 | 2.114199000  | -0.196574000 |
| H | -1.218785000 | 1.512570000  | 1.184721000  |
| O | -3.486062000 | -0.021586000 | -0.094243000 |
| H | -2.143852000 | -2.104903000 | 0.369685000  |
| H | -1.199671000 | -1.159815000 | 1.536390000  |
| H | 0.379747000  | -2.160861000 | -0.078016000 |
| H | -0.515714000 | -1.471925000 | -1.434815000 |
| O | 1.725345000  | -0.116974000 | -1.126882000 |
| C | 2.857972000  | -0.299639000 | -0.293705000 |
| H | 3.037305000  | -1.365072000 | -0.111008000 |
| H | 3.723437000  | 0.139648000  | -0.788008000 |
| O | 1.051278000  | 0.095082000  | 1.042163000  |
| C | 2.431306000  | 0.414264000  | 0.978194000  |
| H | 2.575829000  | 1.497328000  | 0.894352000  |
| H | 2.911845000  | 0.048272000  | 1.884494000  |

**1-o:** E= -345.598379

|   |              |              |              |
|---|--------------|--------------|--------------|
| C | 0.395062000  | 1.066498000  | 0.000000000  |
| C | -0.180283000 | 0.470486000  | -1.268470000 |
| C | -0.180283000 | -1.061040000 | -1.168646000 |
| O | -0.838604000 | -1.498173000 | 0.000000000  |
| C | -0.180283000 | -1.061040000 | 1.168646000  |
| C | -0.180283000 | 0.470486000  | 1.268470000  |
| H | 0.393023000  | 0.820660000  | -2.127754000 |
| H | -1.216360000 | 0.810652000  | -1.371195000 |
| H | -0.710300000 | -1.505292000 | -2.010617000 |
| H | 0.852290000  | -1.437718000 | -1.176023000 |
| H | -0.710300000 | -1.505292000 | 2.010617000  |
| H | 0.852290000  | -1.437718000 | 1.176023000  |
| H | 0.393023000  | 0.820660000  | 2.127754000  |
| H | -1.216360000 | 0.810652000  | 1.371195000  |
| O | 1.253494000  | 1.912055000  | 0.000000000  |

**1-s:** E= -668.580510

|   |              |              |              |
|---|--------------|--------------|--------------|
| C | -0.594012000 | 1.282413000  | 0.000000000  |
| C | 0.017383000  | 0.768820000  | 1.291423000  |
| C | 0.017383000  | -0.762376000 | 1.356210000  |
| S | 0.961511000  | -1.518311000 | 0.000000000  |
| C | 0.017383000  | -0.762376000 | -1.356210000 |
| C | 0.017383000  | 0.768820000  | -1.291423000 |
| H | -0.550321000 | 1.191301000  | 2.122756000  |
| H | 1.050723000  | 1.125372000  | 1.353786000  |
| H | 0.482335000  | -1.104200000 | 2.281185000  |
| H | -1.004796000 | -1.149017000 | 1.338268000  |
| H | 0.482335000  | -1.104200000 | -2.281185000 |
| H | -1.004796000 | -1.149017000 | -1.338268000 |
| H | -0.550321000 | 1.191301000  | -2.122756000 |

|   |              |             |              |
|---|--------------|-------------|--------------|
| H | 1.050723000  | 1.125372000 | -1.353786000 |
| O | -1.524149000 | 2.049282000 | 0.000000000  |

**1-PMe:** E= -651.603624

|   |              |              |              |
|---|--------------|--------------|--------------|
| C | 0.257249000  | -0.609785000 | 1.402406000  |
| C | 0.257249000  | 0.924606000  | 1.288023000  |
| C | 0.907472000  | 1.392420000  | 0.000000000  |
| C | 0.257249000  | 0.924606000  | -1.288023000 |
| C | 0.257249000  | -0.609785000 | -1.402406000 |
| P | -0.521968000 | -1.553761000 | 0.000000000  |
| H | -0.240022000 | -0.915273000 | 2.326985000  |
| H | 1.288087000  | -0.968831000 | 1.482498000  |
| H | 0.799646000  | 1.374081000  | 2.121678000  |
| H | -0.771406000 | 1.298956000  | 1.317138000  |
| O | 1.899844000  | 2.078423000  | 0.000000000  |
| H | 0.799646000  | 1.374081000  | -2.121678000 |
| H | -0.771406000 | 1.298956000  | -1.317138000 |
| H | -0.240022000 | -0.915273000 | -2.326985000 |
| H | 1.288087000  | -0.968831000 | -1.482498000 |
| C | -2.225557000 | -0.822244000 | 0.000000000  |
| H | -2.763251000 | -1.182947000 | -0.879169000 |
| H | -2.763251000 | -1.182947000 | 0.879169000  |
| H | -2.260809000 | 0.268158000  | 0.000000000  |

**1-C (Me2):** E= -388.224670

|   |              |              |              |
|---|--------------|--------------|--------------|
| C | -0.354997000 | -1.250404000 | -0.395865000 |
| C | 1.018945000  | -1.279397000 | 0.290436000  |
| C | 1.788709000  | -0.000043000 | 0.026302000  |
| C | 1.018978000  | 1.279369000  | 0.290372000  |
| C | -0.355428000 | 1.250974000  | -0.394934000 |
| C | -1.185346000 | 0.000000000  | -0.057749000 |
| H | -0.918150000 | -2.150896000 | -0.130077000 |
| H | -0.204769000 | -1.286692000 | -1.481293000 |
| H | 1.621713000  | -2.122412000 | -0.049080000 |
| H | 0.893051000  | -1.378853000 | 1.374853000  |
| O | 2.925256000  | -0.000028000 | -0.377840000 |
| H | 1.621835000  | 2.122224000  | -0.049382000 |
| H | 0.893885000  | 1.378828000  | 1.374927000  |
| H | -0.918476000 | 2.151060000  | -0.127543000 |
| H | -0.206029000 | 1.288716000  | -1.480415000 |
| C | -2.453622000 | 0.000039000  | -0.913635000 |
| H | -3.064626000 | 0.883744000  | -0.708731000 |
| H | -2.210180000 | -0.000038000 | -1.979733000 |
| H | -3.064852000 | -0.883463000 | -0.708602000 |
| C | -1.595147000 | -0.000546000 | 1.419565000  |
| H | -2.198680000 | 0.881985000  | 1.650120000  |
| H | -2.197394000 | -0.883982000 | 1.649951000  |
| H | -0.741929000 | 0.000042000  | 2.100762000  |

**1-TS-CH2:** E= -402.524952 (i = -214 cm-1)

|   |              |              |              |
|---|--------------|--------------|--------------|
| C | 1.214599000  | -0.438580000 | -1.260771000 |
| C | 0.175272000  | 0.682340000  | -1.282324000 |
| C | -0.666530000 | 0.837480000  | 0.000042000  |
| C | 0.175214000  | 0.682121000  | 1.282421000  |
| C | 1.214552000  | -0.438786000 | 1.260729000  |
| C | 2.079715000  | -0.366843000 | 0.000001000  |
| H | 1.846540000  | -0.380212000 | -2.155470000 |
| H | 0.704099000  | -1.405720000 | -1.290035000 |
| H | -0.514818000 | 0.581695000  | -2.122552000 |
| H | 0.684166000  | 1.650838000  | -1.398229000 |
| O | -1.559765000 | 1.706058000  | 0.000098000  |
| H | -0.514920000 | 0.581322000  | 2.122595000  |
| H | 0.684092000  | 1.650603000  | 1.398524000  |
| H | 1.846461000  | -0.380544000 | 2.155458000  |
| H | 0.704063000  | -1.405936000 | 1.289833000  |
| H | 2.819839000  | -1.175460000 | -0.000052000 |
| H | 2.642696000  | 0.577447000  | 0.000088000  |
| C | -1.479176000 | -0.985513000 | -0.000102000 |
| N | -2.100854000 | -1.967972000 | -0.000131000 |

**1-TS-NMe:** E= -457.838463 (i = -219 cm<sup>-1</sup>)

|   |              |              |              |
|---|--------------|--------------|--------------|
| C | 0.804572000  | 0.691725000  | 1.199908000  |
| C | -0.046140000 | -0.580120000 | 1.278803000  |
| C | -0.850419000 | -0.892455000 | -0.000022000 |
| C | -0.046218000 | -0.579963000 | -1.278865000 |
| C | 0.804598000  | 0.691816000  | -1.199895000 |
| N | 1.643512000  | 0.775564000  | 0.000030000  |
| H | 1.457666000  | 0.775202000  | 2.076626000  |
| H | 0.146453000  | 1.564393000  | 1.198026000  |
| H | -0.743042000 | -0.535464000 | 2.118432000  |
| H | 0.591813000  | -1.459315000 | 1.440468000  |
| O | -1.572588000 | -1.907385000 | -0.000066000 |
| H | -0.743215000 | -0.535091000 | -2.118405000 |
| H | 0.591638000  | -1.459185000 | -1.440766000 |
| H | 1.457756000  | 0.775203000  | -2.076576000 |
| H | 0.146563000  | 1.564548000  | -1.198075000 |
| C | -1.973769000 | 0.748956000  | 0.000074000  |
| N | -2.770993000 | 1.594763000  | 0.000069000  |
| C | 2.720655000  | -0.195768000 | 0.000012000  |
| H | 3.345354000  | -0.040365000 | -0.884891000 |
| H | 3.345423000  | -0.040328000 | 0.884862000  |
| H | 2.396979000  | -1.247951000 | 0.000041000  |

**1-TS-C(O2C2H4):** E= -630.317065 (i = -216 cm<sup>-1</sup>)

|   |              |              |              |
|---|--------------|--------------|--------------|
| C | -0.026126000 | 0.359846000  | 1.395072000  |
| C | -1.137919000 | -0.685766000 | 1.306872000  |
| C | -1.850280000 | -0.788861000 | -0.056644000 |
| C | -0.859168000 | -0.724780000 | -1.237170000 |
| C | 0.238968000  | 0.328704000  | -1.107402000 |

|   |              |              |              |
|---|--------------|--------------|--------------|
| C | 0.944518000  | 0.229158000  | 0.243100000  |
| H | 0.543403000  | 0.261448000  | 2.324083000  |
| H | -0.449661000 | 1.366117000  | 1.356359000  |
| H | -1.898134000 | -0.514439000 | 2.070601000  |
| H | -0.715701000 | -1.683243000 | 1.481199000  |
| O | -2.804235000 | -1.583995000 | -0.149861000 |
| H | -1.436248000 | -0.586078000 | -2.152886000 |
| H | -0.406847000 | -1.723914000 | -1.280022000 |
| H | 0.972664000  | 0.224188000  | -1.916691000 |
| H | -0.186614000 | 1.332212000  | -1.180592000 |
| C | -2.506796000 | 1.083909000  | -0.163160000 |
| N | -3.053099000 | 2.105897000  | -0.252138000 |
| O | 1.968205000  | 1.215014000  | 0.360600000  |
| C | 3.107677000  | 0.702718000  | -0.293548000 |
| H | 3.196648000  | 1.109829000  | -1.306987000 |
| H | 3.989665000  | 0.993479000  | 0.280580000  |
| O | 1.656575000  | -1.003386000 | 0.362759000  |
| C | 2.877991000  | -0.829106000 | -0.316402000 |
| H | 3.648167000  | -1.386882000 | 0.219423000  |
| H | 2.816809000  | -1.209987000 | -1.342400000 |

**1-TS-O:** E= -438.456850 (i = -213 cm-1)

|   |              |              |              |
|---|--------------|--------------|--------------|
| C | -1.238887000 | 0.478468000  | -1.171824000 |
| C | -0.228832000 | -0.656875000 | -1.269876000 |
| C | 0.620505000  | -0.855877000 | 0.000050000  |
| C | -0.228764000 | -0.656672000 | 1.269990000  |
| C | -1.238823000 | 0.478655000  | 1.171810000  |
| O | -2.035517000 | 0.373361000  | 0.000022000  |
| H | -1.939308000 | 0.456565000  | -2.011219000 |
| H | -0.723134000 | 1.446735000  | -1.175524000 |
| H | 0.440945000  | -0.519864000 | -2.121564000 |
| H | -0.764997000 | -1.604210000 | -1.411008000 |
| O | 1.477426000  | -1.757067000 | 0.000100000  |
| H | 0.441058000  | -0.519525000 | 2.121621000  |
| H | -0.764919000 | -1.603986000 | 1.411301000  |
| H | -1.939201000 | 0.456888000  | 2.011246000  |
| H | -0.723070000 | 1.446922000  | 1.175327000  |
| C | 1.507768000  | 0.935368000  | -0.000115000 |
| N | 2.182793000  | 1.881674000  | -0.000196000 |

**1-TS-S:** E= -761.441775 (i = -209 cm.1)

|   |              |              |              |
|---|--------------|--------------|--------------|
| C | -0.936683000 | 0.319168000  | -1.365915000 |
| C | 0.156743000  | -0.738906000 | -1.295472000 |
| C | 0.989536000  | -0.806760000 | 0.000049000  |
| C | 0.156784000  | -0.738691000 | 1.295586000  |
| C | -0.936640000 | 0.319395000  | 1.365887000  |
| S | -2.137470000 | 0.174583000  | 0.000018000  |
| H | -1.520565000 | 0.217257000  | -2.283974000 |
| H | -0.508685000 | 1.322258000  | -1.342283000 |
| H | 0.865594000  | -0.604602000 | -2.116888000 |

|   |              |              |              |
|---|--------------|--------------|--------------|
| H | -0.292330000 | -1.733980000 | -1.403751000 |
| O | 1.959052000  | -1.586974000 | 0.000099000  |
| H | 0.865660000  | -0.604253000 | 2.116957000  |
| H | -0.292286000 | -1.733748000 | 1.404042000  |
| H | -1.520492000 | 0.217636000  | 2.283983000  |
| H | -0.508642000 | 1.322480000  | 1.342075000  |
| C | 1.626044000  | 1.087633000  | -0.000115000 |
| N | 2.157735000  | 2.121198000  | -0.000194000 |

**1-TS-PMe:** E= -744.461905 (i = -208 cm-1)

|   |              |              |              |
|---|--------------|--------------|--------------|
| C | 0.551226000  | -0.553038000 | -1.407267000 |
| C | -0.316011000 | 0.701890000  | -1.299574000 |
| C | -1.115838000 | 0.917416000  | 0.000191000  |
| C | -0.317358000 | 0.699840000  | 1.300480000  |
| C | 0.551428000  | -0.554254000 | 1.406893000  |
| P | 1.722181000  | -0.865244000 | -0.000428000 |
| H | 1.145288000  | -0.532646000 | -2.328397000 |
| H | -0.087213000 | -1.438490000 | -1.465246000 |
| H | -1.042628000 | 0.731809000  | -2.115434000 |
| H | 0.302592000  | 1.602644000  | -1.405581000 |
| O | -1.928232000 | 1.860906000  | 0.000562000  |
| H | -1.045243000 | 0.726644000  | 2.115312000  |
| H | 0.299700000  | 1.601259000  | 1.409703000  |
| H | 1.146251000  | -0.533141000 | 2.327536000  |
| H | -0.085925000 | -1.440440000 | 1.465542000  |
| C | -2.083666000 | -0.839073000 | -0.001040000 |
| N | -2.782223000 | -1.768228000 | -0.000620000 |
| C | 2.683701000  | 0.729509000  | 0.000505000  |
| H | 3.331039000  | 0.755150000  | 0.880760000  |
| H | 3.325692000  | 0.759390000  | -0.883543000 |
| H | 2.058264000  | 1.623088000  | 0.004491000  |

**1-TS-C (Me2):** E= -481.078350 (i = -218 cm-1)

|   |              |              |              |
|---|--------------|--------------|--------------|
| C | -0.647031000 | 0.276781000  | -1.253179000 |
| C | 0.520199000  | -0.709513000 | -1.281936000 |
| C | 1.375019000  | -0.764320000 | 0.000018000  |
| C | 0.520205000  | -0.709502000 | 1.281972000  |
| C | -0.646920000 | 0.276897000  | 1.253212000  |
| C | -1.532014000 | 0.146085000  | 0.000076000  |
| H | -1.272390000 | 0.148091000  | -2.147761000 |
| H | -0.247864000 | 1.295376000  | -1.287781000 |
| H | 1.190843000  | -0.500486000 | -2.117803000 |
| H | 0.154241000  | -1.735273000 | -1.423765000 |
| O | 2.365052000  | -1.522308000 | 0.000011000  |
| H | 1.190861000  | -0.500600000 | 2.117860000  |
| H | 0.154101000  | -1.735223000 | 1.423726000  |
| H | -1.272204000 | 0.148423000  | 2.147875000  |
| H | -0.247673000 | 1.295470000  | 1.287586000  |
| C | 1.957531000  | 1.134532000  | -0.000016000 |
| N | 2.446100000  | 2.189294000  | -0.000083000 |

|   |              |              |              |
|---|--------------|--------------|--------------|
| C | -2.568010000 | 1.272108000  | 0.000014000  |
| H | -3.210911000 | 1.216962000  | 0.885574000  |
| H | -2.076218000 | 2.248959000  | 0.000455000  |
| H | -3.210112000 | 1.217357000  | -0.886179000 |
| C | -2.274887000 | -1.195433000 | -0.000006000 |
| H | -2.913391000 | -1.282904000 | 0.886144000  |
| H | -2.914698000 | -1.281829000 | -0.885348000 |
| H | -1.592256000 | -2.046725000 | -0.001020000 |

**Me<sub>2</sub>S=CH-CN:** E= -609.339470

|   |              |              |              |
|---|--------------|--------------|--------------|
| C | -0.724267000 | 0.000776000  | -1.074065000 |
| H | -0.892399000 | 0.000630000  | -2.136483000 |
| C | -1.734623000 | 0.000190000  | -0.108057000 |
| N | -2.500221000 | -0.000393000 | 0.764165000  |
| S | 0.874037000  | 0.000148000  | -0.555776000 |
| C | 1.055731000  | 1.362928000  | 0.638130000  |
| H | 0.979300000  | 2.287868000  | 0.071041000  |
| H | 0.242736000  | 1.300386000  | 1.362308000  |
| H | 2.026034000  | 1.294088000  | 1.129031000  |
| C | 1.055485000  | -1.363571000 | 0.637106000  |
| H | 2.025905000  | -1.295066000 | 1.127791000  |
| H | 0.242639000  | -1.301347000 | 1.361472000  |
| H | 0.978780000  | -2.288121000 | 0.069418000  |

**Me<sub>2</sub>S=CH-CO<sub>2</sub>Me:** E= -744.916589

|   |              |              |              |
|---|--------------|--------------|--------------|
| C | 0.121475000  | -1.299746000 | 0.000099000  |
| H | 0.206709000  | -2.373825000 | -0.000259000 |
| S | 1.593014000  | -0.485782000 | -0.000050000 |
| C | 1.639487000  | 0.711608000  | -1.370315000 |
| H | 2.575865000  | 1.267214000  | -1.319467000 |
| H | 1.594920000  | 0.130180000  | -2.288648000 |
| H | 0.777687000  | 1.370120000  | -1.292936000 |
| C | 1.639751000  | 0.711549000  | 1.370240000  |
| H | 2.576015000  | 1.267303000  | 1.319057000  |
| H | 0.777785000  | 1.369863000  | 1.293145000  |
| H | 1.595624000  | 0.130124000  | 2.288597000  |
| C | -1.166429000 | -0.692671000 | 0.000057000  |
| O | -2.235989000 | -1.260713000 | -0.000045000 |
| O | -1.104772000 | 0.691424000  | 0.000144000  |
| C | -2.370235000 | 1.339797000  | 0.000007000  |
| H | -2.945454000 | 1.066120000  | -0.884763000 |
| H | -2.944382000 | 1.068442000  | 0.886221000  |
| H | -2.161192000 | 2.408058000  | -0.001467000 |

**Me<sub>2</sub>S=CH-p(NO<sub>2</sub>)C<sub>6</sub>H<sub>4</sub>:** E= -952.508270

|   |             |              |              |
|---|-------------|--------------|--------------|
| C | 1.871671000 | -1.197570000 | -0.000088000 |
| H | 2.089321000 | -2.255434000 | -0.000391000 |
| S | 3.284747000 | -0.293564000 | 0.000010000  |

|   |              |              |              |
|---|--------------|--------------|--------------|
| C | 3.320501000  | 0.903517000  | -1.381867000 |
| H | 4.250810000  | 1.467780000  | -1.318148000 |
| H | 3.303289000  | 0.311433000  | -2.294129000 |
| H | 2.463921000  | 1.572073000  | -1.356239000 |
| C | 3.320064000  | 0.903169000  | 1.382139000  |
| H | 4.250229000  | 1.467704000  | 1.318763000  |
| H | 2.463308000  | 1.571506000  | 1.356562000  |
| H | 3.302820000  | 0.310828000  | 2.294236000  |
| C | 0.522641000  | -0.738763000 | -0.000077000 |
| C | -0.516029000 | -1.707661000 | -0.000067000 |
| C | 0.120171000  | 0.619190000  | -0.000103000 |
| C | -1.845129000 | -1.353091000 | -0.000035000 |
| C | -1.212880000 | 0.983189000  | -0.000066000 |
| C | -2.192374000 | -0.001495000 | -0.000031000 |
| H | -0.246951000 | -2.758215000 | -0.000060000 |
| H | 0.855945000  | 1.412740000  | -0.000186000 |
| H | -2.625485000 | -2.103017000 | -0.000012000 |
| H | -1.507519000 | 2.024703000  | -0.000086000 |
| N | -3.594699000 | 0.382541000  | 0.000022000  |
| O | -3.862038000 | 1.570838000  | 0.000041000  |
| O | -4.428534000 | -0.504060000 | 0.000027000  |

**[Cl-CH-SO<sub>2</sub>Ph]<sup>-</sup>**: E= -1278.957760

|    |              |              |              |
|----|--------------|--------------|--------------|
| C  | -2.034909000 | 0.036078000  | -0.844159000 |
| H  | -1.655981000 | -0.167263000 | -1.844826000 |
| Cl | -1.885283000 | 1.818897000  | -0.557236000 |
| S  | -1.073561000 | -0.850337000 | 0.260077000  |
| O  | -1.440693000 | -0.556556000 | 1.649637000  |
| O  | -1.069700000 | -2.248122000 | -0.202826000 |
| C  | 0.667890000  | -0.343501000 | 0.166743000  |
| C  | 1.520838000  | -0.977305000 | -0.732144000 |
| C  | 1.113085000  | 0.738343000  | 0.920799000  |
| C  | 2.829922000  | -0.529545000 | -0.873244000 |
| C  | 2.422283000  | 1.187544000  | 0.769727000  |
| C  | 3.282338000  | 0.555733000  | -0.124482000 |
| H  | 1.147046000  | -1.825769000 | -1.295298000 |
| H  | 0.431434000  | 1.203436000  | 1.623360000  |
| H  | 3.501637000  | -1.030146000 | -1.563649000 |
| H  | 2.773576000  | 2.031353000  | 1.355103000  |
| H  | 4.303536000  | 0.905860000  | -0.236844000 |

**Me<sub>2</sub>S=CH-CN, TS (1-CH<sub>2</sub>)**: E= -919.001503 (i = -240 cm<sup>-1</sup>)

|   |             |              |              |
|---|-------------|--------------|--------------|
| C | 2.462546000 | 1.204571000  | 0.367624000  |
| C | 1.544198000 | 0.403243000  | 1.291378000  |
| C | 0.728178000 | -0.699200000 | 0.606914000  |
| C | 1.558423000 | -1.495048000 | -0.417273000 |
| C | 2.497005000 | -0.673462000 | -1.302159000 |
| C | 3.350400000 | 0.279291000  | -0.464596000 |
| H | 3.074318000 | 1.889175000  | 0.961887000  |
| H | 1.872222000 | 1.837196000  | -0.306062000 |

|   |              |              |              |
|---|--------------|--------------|--------------|
| H | 0.864698000  | 1.052500000  | 1.851346000  |
| H | 2.148207000  | -0.127226000 | 2.037768000  |
| O | -0.027576000 | -1.407157000 | 1.364763000  |
| H | 0.882081000  | -2.125810000 | -1.005089000 |
| H | 2.149331000  | -2.184936000 | 0.197010000  |
| H | 3.132722000  | -1.344778000 | -1.887137000 |
| H | 1.929936000  | -0.083651000 | -2.034041000 |
| H | 4.012756000  | 0.863120000  | -1.110126000 |
| H | 3.993909000  | -0.305665000 | 0.204018000  |
| C | -0.433642000 | 0.243078000  | -0.533912000 |
| H | -0.160177000 | 0.104267000  | -1.579997000 |
| C | -0.715421000 | 1.618906000  | -0.246700000 |
| N | -0.961159000 | 2.706054000  | 0.054710000  |
| S | -1.921325000 | -0.759174000 | -0.269626000 |
| C | -2.559224000 | -0.184743000 | 1.320091000  |
| H | -1.818467000 | -0.503265000 | 2.050159000  |
| H | -2.679676000 | 0.897791000  | 1.290327000  |
| H | -3.516173000 | -0.683454000 | 1.469357000  |
| C | -3.120694000 | 0.062058000  | -1.356268000 |
| H | -4.096888000 | -0.388126000 | -1.177604000 |
| H | -3.148366000 | 1.132297000  | -1.152520000 |
| H | -2.821118000 | -0.119945000 | -2.386944000 |

**Me<sub>2</sub>S=CH-CN, TS (1-S):** E= -1277.911178 (i = -240 cm<sup>-1</sup>)

|   |              |              |              |
|---|--------------|--------------|--------------|
| C | 2.195377000  | 1.261496000  | 0.367712000  |
| C | 1.271988000  | 0.528566000  | 1.334389000  |
| C | 0.447141000  | -0.625836000 | 0.754808000  |
| C | 1.253288000  | -1.586357000 | -0.141158000 |
| C | 2.208486000  | -0.976539000 | -1.161853000 |
| S | 3.413434000  | 0.153840000  | -0.405949000 |
| H | 2.772917000  | 2.022597000  | 0.894429000  |
| H | 1.640961000  | 1.775893000  | -0.422093000 |
| H | 0.582487000  | 1.233301000  | 1.810677000  |
| H | 1.868409000  | 0.078307000  | 2.134149000  |
| O | -0.346080000 | -1.209921000 | 1.572134000  |
| H | 0.544130000  | -2.263506000 | -0.633195000 |
| H | 1.824672000  | -2.200557000 | 0.561654000  |
| H | 2.792972000  | -1.759186000 | -1.648637000 |
| H | 1.683553000  | -0.435666000 | -1.955428000 |
| C | -0.662309000 | 0.213943000  | -0.522985000 |
| H | -0.349478000 | 0.001370000  | -1.545552000 |
| C | -0.953171000 | 1.606365000  | -0.347374000 |
| N | -1.201544000 | 2.713615000  | -0.134612000 |
| S | -2.160508000 | -0.769984000 | -0.249366000 |
| C | -2.896385000 | -0.061014000 | 1.240613000  |
| H | -2.199735000 | -0.299386000 | 2.040901000  |
| H | -3.023651000 | 1.012446000  | 1.104295000  |
| H | -3.856269000 | -0.557756000 | 1.377087000  |
| C | -3.296575000 | -0.066548000 | -1.476480000 |
| H | -4.280353000 | -0.505532000 | -1.312361000 |
| H | -3.338041000 | 1.017785000  | -1.375409000 |

H            -2.936989000            -0.342186000            -2.466290000

**Me<sub>2</sub>S=CH-CO<sub>2</sub>Me, TS (1-CH<sub>2</sub>):** E= -1054.571550 (i = -258 cm<sup>-1</sup>)

|   |              |              |              |
|---|--------------|--------------|--------------|
| C | 2.548809000  | 1.336778000  | 0.103214000  |
| C | 1.646288000  | 0.710306000  | 1.169239000  |
| C | 0.996370000  | -0.630841000 | 0.796177000  |
| C | 1.967173000  | -1.556427000 | 0.032723000  |
| C | 2.866815000  | -0.888797000 | -1.007403000 |
| C | 3.574783000  | 0.328388000  | -0.413156000 |
| H | 3.054371000  | 2.211341000  | 0.524256000  |
| H | 1.952858000  | 1.701027000  | -0.738584000 |
| H | 0.865223000  | 1.399906000  | 1.506525000  |
| H | 2.242260000  | 0.476439000  | 2.060360000  |
| O | 0.320911000  | -1.207800000 | 1.720305000  |
| H | 1.402014000  | -2.395491000 | -0.387902000 |
| H | 2.591757000  | -1.987589000 | 0.824378000  |
| H | 3.595953000  | -1.614459000 | -1.380878000 |
| H | 2.287077000  | -0.564494000 | -1.880510000 |
| H | 4.223088000  | 0.794607000  | -1.160768000 |
| H | 4.221973000  | 0.003847000  | 0.411369000  |
| C | -0.236457000 | -0.200159000 | -0.564044000 |
| H | 0.191055000  | -0.427841000 | -1.539607000 |
| S | -1.422970000 | -1.516284000 | -0.269799000 |
| C | -2.407811000 | -1.173422000 | 1.213137000  |
| H | -2.841492000 | -2.132138000 | 1.495114000  |
| H | -1.693936000 | -0.840323000 | 1.962301000  |
| H | -3.168341000 | -0.432589000 | 0.987445000  |
| C | -2.680676000 | -1.198705000 | -1.535155000 |
| H | -3.489979000 | -1.915525000 | -1.396311000 |
| H | -3.053782000 | -0.179628000 | -1.438798000 |
| H | -2.224238000 | -1.344993000 | -2.512208000 |
| C | -0.748722000 | 1.181579000  | -0.564950000 |
| O | -0.338476000 | 2.059362000  | -1.284271000 |
| O | -1.683723000 | 1.409154000  | 0.385970000  |
| C | -2.070669000 | 2.774192000  | 0.542210000  |
| H | -1.204367000 | 3.382992000  | 0.800328000  |
| H | -2.511675000 | 3.156919000  | -0.378219000 |
| H | -2.797420000 | 2.785464000  | 1.350499000  |

**Me<sub>2</sub>S=CH-CO<sub>2</sub>Me, TS (1-S):** E= -1413.481470 (i = -253 cm<sup>-1</sup>)

|   |             |              |              |
|---|-------------|--------------|--------------|
| C | 2.305023000 | 1.331666000  | 0.198929000  |
| C | 1.392663000 | 0.678424000  | 1.233774000  |
| C | 0.726350000 | -0.652571000 | 0.850638000  |
| C | 1.676422000 | -1.641682000 | 0.140697000  |
| C | 2.608999000 | -1.095852000 | -0.934672000 |
| S | 3.669338000 | 0.240888000  | -0.310623000 |
| H | 2.773868000 | 2.223968000  | 0.617555000  |
| H | 1.761553000 | 1.639916000  | -0.695072000 |
| H | 0.605360000 | 1.373160000  | 1.549170000  |

|   |              |              |              |
|---|--------------|--------------|--------------|
| H | 1.974155000  | 0.445147000  | 2.131570000  |
| O | 0.010455000  | -1.189778000 | 1.766142000  |
| H | 1.073991000  | -2.468703000 | -0.254158000 |
| H | 2.278626000  | -2.063143000 | 0.951443000  |
| H | 3.280776000  | -1.880268000 | -1.287780000 |
| H | 2.068795000  | -0.720260000 | -1.808814000 |
| C | -0.460348000 | -0.208730000 | -0.548150000 |
| H | -0.018815000 | -0.451194000 | -1.514163000 |
| S | -1.685568000 | -1.496139000 | -0.277112000 |
| C | -2.704044000 | -1.121704000 | 1.175572000  |
| H | -3.163990000 | -2.069676000 | 1.452103000  |
| H | -2.005944000 | -0.796021000 | 1.942609000  |
| H | -3.443319000 | -0.368385000 | 0.922502000  |
| C | -2.898158000 | -1.162442000 | -1.581040000 |
| H | -3.725299000 | -1.861890000 | -1.460344000 |
| H | -3.253033000 | -0.135445000 | -1.502120000 |
| H | -2.416853000 | -1.325705000 | -2.543334000 |
| C | -0.941644000 | 1.184885000  | -0.569840000 |
| O | -0.479902000 | 2.050835000  | -1.272129000 |
| O | -1.908189000 | 1.435674000  | 0.340811000  |
| C | -2.272776000 | 2.809862000  | 0.477557000  |
| H | -1.405269000 | 3.400999000  | 0.770069000  |
| H | -2.666712000 | 3.197882000  | -0.461644000 |
| H | -3.032028000 | 2.838648000  | 1.254770000  |

**Me<sub>2</sub>S=CH-p(NO<sub>2</sub>)C<sub>6</sub>H<sub>4</sub>, TS (1-CH<sub>2</sub>):** E= -1262.173388 (i = -245 cm<sup>-1</sup>)

|   |              |              |              |
|---|--------------|--------------|--------------|
| C | -1.936539000 | -2.629328000 | -0.390685000 |
| C | -1.517331000 | -1.909908000 | 0.891878000  |
| C | -1.993422000 | -0.455696000 | 1.028780000  |
| C | -3.466243000 | -0.295086000 | 0.603806000  |
| C | -3.880255000 | -1.023849000 | -0.675440000 |
| C | -3.440029000 | -2.489731000 | -0.641322000 |
| H | -1.668712000 | -3.687677000 | -0.320263000 |
| H | -1.379751000 | -2.239934000 | -1.251301000 |
| H | -0.437001000 | -1.947735000 | 1.052245000  |
| H | -1.968205000 | -2.417701000 | 1.754321000  |
| O | -1.639208000 | 0.159251000  | 2.079009000  |
| H | -3.729856000 | 0.767555000  | 0.572964000  |
| H | -4.030046000 | -0.709355000 | 1.449666000  |
| H | -4.966282000 | -0.964734000 | -0.795499000 |
| H | -3.456915000 | -0.531009000 | -1.558597000 |
| C | -1.031754000 | 0.342315000  | -0.491676000 |
| H | -1.392799000 | -0.075073000 | -1.431005000 |
| S | -1.567285000 | 2.034961000  | -0.601338000 |
| C | -1.312354000 | 2.818402000  | 1.010269000  |
| H | -1.828328000 | 3.776714000  | 0.973133000  |
| H | -1.734398000 | 2.136727000  | 1.753575000  |
| H | -0.246328000 | 2.957620000  | 1.182880000  |
| C | -0.307979000 | 2.921163000  | -1.558899000 |
| H | -0.555117000 | 3.982559000  | -1.544699000 |
| H | 0.672552000  | 2.742059000  | -1.118452000 |

|   |              |              |              |
|---|--------------|--------------|--------------|
| H | -0.340165000 | 2.542888000  | -2.579087000 |
| C | 0.422546000  | 0.147681000  | -0.323821000 |
| C | 1.168412000  | -0.469206000 | -1.340965000 |
| C | 1.077104000  | 0.499427000  | 0.869880000  |
| C | 2.525714000  | -0.707856000 | -1.196548000 |
| C | 2.437629000  | 0.274080000  | 1.022815000  |
| C | 3.142727000  | -0.316063000 | -0.016542000 |
| H | 0.673108000  | -0.762251000 | -2.261222000 |
| H | 0.489797000  | 0.871990000  | 1.699600000  |
| H | 3.107654000  | -1.177965000 | -1.978163000 |
| H | 2.951370000  | 0.531073000  | 1.939879000  |
| N | 4.589244000  | -0.543739000 | 0.138260000  |
| O | 5.113427000  | -0.158199000 | 1.161613000  |
| O | 5.171199000  | -1.100427000 | -0.769346000 |
| H | -3.980347000 | -2.999773000 | 0.165657000  |
| H | -3.721083000 | -2.992243000 | -1.571430000 |

**Me<sub>2</sub>S=CH-p(NO<sub>2</sub>)C<sub>6</sub>H<sub>4</sub>, TS (1-S):** E= -1621.083492 (i = -240 cm<sup>-1</sup>)

|   |              |              |              |
|---|--------------|--------------|--------------|
| C | -1.832676000 | -2.396302000 | -0.154475000 |
| C | -1.463371000 | -1.616518000 | 1.101401000  |
| C | -1.832979000 | -0.127209000 | 1.143308000  |
| C | -3.294507000 | 0.148271000  | 0.744436000  |
| C | -3.810823000 | -0.488013000 | -0.540533000 |
| S | -3.604277000 | -2.296407000 | -0.567157000 |
| H | -1.641271000 | -3.460571000 | -0.005534000 |
| H | -1.237421000 | -2.090433000 | -1.017520000 |
| H | -0.392264000 | -1.705466000 | 1.305137000  |
| H | -1.982414000 | -2.053186000 | 1.961765000  |
| O | -1.407855000 | 0.517024000  | 2.144927000  |
| H | -3.455201000 | 1.232497000  | 0.723506000  |
| H | -3.883902000 | -0.226226000 | 1.588785000  |
| H | -4.886891000 | -0.328261000 | -0.632648000 |
| H | -3.353440000 | -0.050457000 | -1.431095000 |
| C | -0.836296000 | 0.498628000  | -0.456094000 |
| H | -1.246055000 | 0.059072000  | -1.365823000 |
| S | -1.238266000 | 2.219361000  | -0.656001000 |
| C | -0.863887000 | 3.071568000  | 0.896011000  |
| H | -1.286353000 | 4.071539000  | 0.809043000  |
| H | -1.327814000 | 2.485027000  | 1.692643000  |
| H | 0.215091000  | 3.116910000  | 1.034765000  |
| C | 0.054135000  | 2.942348000  | -1.702874000 |
| H | -0.107893000 | 4.019161000  | -1.747616000 |
| H | 1.031638000  | 2.711234000  | -1.280281000 |
| H | -0.042468000 | 2.507866000  | -2.696251000 |
| C | 0.603386000  | 0.200398000  | -0.303209000 |
| C | 1.283278000  | -0.506907000 | -1.308007000 |
| C | 1.305172000  | 0.549314000  | 0.864060000  |
| C | 2.622469000  | -0.838385000 | -1.176836000 |
| C | 2.648760000  | 0.231087000  | 1.003183000  |
| C | 3.288527000  | -0.448491000 | -0.023425000 |
| H | 0.751821000  | -0.795621000 | -2.209449000 |

|   |             |              |              |
|---|-------------|--------------|--------------|
| H | 0.764499000 | 0.998682000  | 1.687471000  |
| H | 3.153858000 | -1.378372000 | -1.949286000 |
| H | 3.197769000 | 0.485357000  | 1.900376000  |
| N | 4.718097000 | -0.775901000 | 0.116791000  |
| O | 5.286717000 | -0.393470000 | 1.116989000  |
| O | 5.240589000 | -1.405234000 | -0.778999000 |

**[Cl-CH-SO<sub>2</sub>Ph]<sup>-</sup>, TS(1-CH2):** E= -1588.635571 (i = -185 cm<sup>-1</sup>)

|    |              |              |              |
|----|--------------|--------------|--------------|
| C  | 2.888730000  | 1.705101000  | 0.393770000  |
| C  | 2.754176000  | 0.378592000  | 1.145129000  |
| C  | 2.311605000  | -0.838276000 | 0.301530000  |
| C  | 3.019425000  | -0.845371000 | -1.084045000 |
| C  | 3.186473000  | 0.499776000  | -1.794931000 |
| C  | 3.766151000  | 1.553463000  | -0.849910000 |
| H  | 3.309421000  | 2.465761000  | 1.061877000  |
| H  | 1.900019000  | 2.072431000  | 0.105360000  |
| H  | 2.097878000  | 0.468378000  | 2.013444000  |
| H  | 3.739992000  | 0.085138000  | 1.532456000  |
| O  | 2.274114000  | -1.952577000 | 0.885009000  |
| H  | 2.526201000  | -1.586823000 | -1.717973000 |
| H  | 4.014495000  | -1.250656000 | -0.857012000 |
| H  | 3.834510000  | 0.378554000  | -2.671718000 |
| H  | 2.224803000  | 0.858198000  | -2.180897000 |
| H  | 3.871352000  | 2.514823000  | -1.366482000 |
| H  | 4.776130000  | 1.244238000  | -0.547520000 |
| C  | 0.545001000  | -0.364504000 | -0.274310000 |
| H  | 0.499097000  | 0.394610000  | -1.056602000 |
| Cl | -0.146557000 | -1.863065000 | -0.955148000 |
| S  | -0.553607000 | 0.258576000  | 0.983494000  |
| O  | -0.660678000 | -0.653717000 | 2.113473000  |
| O  | -0.177593000 | 1.659468000  | 1.211102000  |
| C  | -2.203475000 | 0.321532000  | 0.251100000  |
| C  | -2.578220000 | 1.441129000  | -0.481017000 |
| C  | -3.063987000 | -0.756954000 | 0.413825000  |
| C  | -3.838952000 | 1.478496000  | -1.067743000 |
| C  | -4.322448000 | -0.713070000 | -0.177524000 |
| C  | -4.709091000 | 0.401347000  | -0.917521000 |
| H  | -1.887607000 | 2.272979000  | -0.566973000 |
| H  | -2.736754000 | -1.607553000 | 1.000558000  |
| H  | -4.145282000 | 2.350195000  | -1.636189000 |
| H  | -5.002627000 | -1.549842000 | -0.060396000 |
| H  | -5.691531000 | 0.431502000  | -1.377117000 |

**[Cl-CH-SO<sub>2</sub>Ph]<sup>-</sup>, TS(1-S):** E= -1947.551581 (i = -190 cm<sup>-1</sup>)

|   |              |              |              |
|---|--------------|--------------|--------------|
| C | -2.679872000 | 1.407711000  | -0.815411000 |
| C | -2.534594000 | -0.028847000 | -1.307290000 |
| C | -2.064703000 | -1.088048000 | -0.287463000 |
| C | -2.815846000 | -0.984587000 | 1.068228000  |
| C | -3.014415000 | 0.388168000  | 1.702418000  |
| S | -3.840559000 | 1.566393000  | 0.584626000  |

|    |              |              |              |
|----|--------------|--------------|--------------|
| H  | -3.087170000 | 2.044611000  | -1.604156000 |
| H  | -1.719384000 | 1.833629000  | -0.528564000 |
| H  | -1.862041000 | -0.064025000 | -2.168347000 |
| H  | -3.511681000 | -0.389538000 | -1.649790000 |
| O  | -1.936853000 | -2.259289000 | -0.719427000 |
| H  | -2.316504000 | -1.659546000 | 1.769290000  |
| H  | -3.799504000 | -1.418670000 | 0.856784000  |
| H  | -3.660711000 | 0.314881000  | 2.580906000  |
| H  | -2.072437000 | 0.828175000  | 2.038083000  |
| C  | -0.331277000 | -0.421024000 | 0.270952000  |
| H  | -0.338950000 | 0.470029000  | 0.901134000  |
| Cl | 0.388797000  | -1.738570000 | 1.236479000  |
| S  | 0.787505000  | 0.009200000  | -1.046491000 |
| O  | 0.997103000  | -1.096828000 | -1.968989000 |
| O  | 0.339942000  | 1.311390000  | -1.557552000 |
| C  | 2.392908000  | 0.320674000  | -0.282709000 |
| C  | 2.665836000  | 1.581601000  | 0.232997000  |
| C  | 3.320837000  | -0.710169000 | -0.202964000 |
| C  | 3.892128000  | 1.812778000  | 0.847281000  |
| C  | 4.544284000  | -0.471520000 | 0.414869000  |
| C  | 4.829188000  | 0.786324000  | 0.939617000  |
| H  | 1.925478000  | 2.367717000  | 0.131787000  |
| H  | 3.073011000  | -1.676325000 | -0.627170000 |
| H  | 4.119435000  | 2.794828000  | 1.247955000  |
| H  | 5.276663000  | -1.268367000 | 0.486127000  |
| H  | 5.784742000  | 0.968256000  | 1.420258000  |

**2-NMe2:** E= -479.266390

|   |              |              |              |
|---|--------------|--------------|--------------|
| C | 3.294272000  | 0.328609000  | -0.009121000 |
| H | 3.682565000  | 1.368066000  | -0.014422000 |
| O | 4.061596000  | -0.603446000 | -0.012293000 |
| C | 1.829365000  | 0.215563000  | 0.001260000  |
| C | 1.202869000  | -1.035108000 | 0.006832000  |
| C | 1.032253000  | 1.359694000  | 0.001484000  |
| C | -0.171673000 | -1.141459000 | 0.015348000  |
| C | -0.348727000 | 1.275964000  | 0.009799000  |
| C | -0.988505000 | 0.016713000  | 0.021136000  |
| H | 1.821797000  | -1.925968000 | 0.003097000  |
| H | 1.502725000  | 2.339299000  | -0.006377000 |
| H | -0.620792000 | -2.125467000 | 0.017089000  |
| H | -0.930131000 | 2.187777000  | 0.006339000  |
| N | -2.354517000 | -0.084227000 | 0.037880000  |
| C | -2.984926000 | -1.387742000 | -0.022357000 |
| H | -4.065142000 | -1.262868000 | -0.009051000 |
| H | -2.715169000 | -1.927588000 | -0.936727000 |
| H | -2.707387000 | -2.005024000 | 0.837266000  |
| C | -3.166066000 | 1.114335000  | -0.019214000 |
| H | -2.984476000 | 1.684889000  | -0.936957000 |
| H | -4.217266000 | 0.836783000  | 0.005410000  |
| H | -2.971046000 | 1.767846000  | 0.836518000  |

**2-tBu:** E= -502.497414

|   |              |              |              |
|---|--------------|--------------|--------------|
| C | 3.589483000  | 0.311748000  | 0.000013000  |
| H | 3.995274000  | 1.343590000  | 0.000074000  |
| O | 4.333450000  | -0.634806000 | -0.000103000 |
| C | 2.112256000  | 0.218987000  | 0.000014000  |
| C | 1.475746000  | -1.025115000 | 0.000045000  |
| C | 1.344497000  | 1.377181000  | 0.000034000  |
| C | 0.095051000  | -1.092346000 | 0.000058000  |
| C | -0.046068000 | 1.302615000  | -0.000020000 |
| C | -0.697421000 | 0.068527000  | -0.000107000 |
| H | 2.082427000  | -1.924052000 | 0.000045000  |
| H | 1.833624000  | 2.347388000  | 0.000086000  |
| H | -0.380529000 | -2.067161000 | 0.000079000  |
| H | -0.615858000 | 2.222946000  | 0.000041000  |
| C | -2.220831000 | -0.062573000 | -0.000018000 |
| C | -2.662224000 | -0.833520000 | -1.255177000 |
| H | -3.751108000 | -0.931899000 | -1.271667000 |
| H | -2.353079000 | -0.309523000 | -2.162916000 |
| H | -2.237208000 | -1.838658000 | -1.286698000 |
| C | -2.662171000 | -0.832615000 | 1.255699000  |
| H | -2.353022000 | -0.307932000 | 2.163043000  |
| H | -3.751048000 | -0.931263000 | 1.272469000  |
| H | -2.236854000 | -1.837597000 | 1.288067000  |
| C | -2.921361000 | 1.298697000  | -0.000503000 |
| H | -4.003894000 | 1.151970000  | -0.000940000 |
| H | -2.669385000 | 1.885772000  | 0.886291000  |
| H | -2.668677000 | 1.885345000  | -0.887376000 |

**2-Me:** E= -384.675747

|   |              |              |              |
|---|--------------|--------------|--------------|
| C | -2.512204000 | 0.365752000  | 0.001118000  |
| H | -2.874121000 | 1.413747000  | 0.001815000  |
| O | -3.295417000 | -0.548464000 | 0.001410000  |
| C | -1.039904000 | 0.210788000  | 0.000042000  |
| C | -0.460458000 | -1.061372000 | -0.000921000 |
| C | -0.225571000 | 1.339228000  | -0.000504000 |
| C | 0.916823000  | -1.189915000 | -0.002384000 |
| C | 1.158746000  | 1.203095000  | -0.001915000 |
| C | 1.747202000  | -0.060341000 | -0.002072000 |
| H | -1.108350000 | -1.931014000 | -0.001283000 |
| H | -0.675554000 | 2.328032000  | -0.000535000 |
| H | 1.367458000  | -2.177857000 | -0.003809000 |
| H | 1.788404000  | 2.086753000  | -0.002989000 |
| C | 3.243173000  | -0.225071000 | 0.002929000  |
| H | 3.575347000  | -0.722257000 | 0.917722000  |
| H | 3.571116000  | -0.839618000 | -0.838580000 |
| H | 3.752197000  | 0.736943000  | -0.061381000 |

**2-H:** E= -345.397271

|   |              |             |             |
|---|--------------|-------------|-------------|
| C | -1.943735362 | 0.499939050 | 0.000000000 |
|---|--------------|-------------|-------------|

|   |              |              |             |
|---|--------------|--------------|-------------|
| H | -2.220008667 | 1.573494049  | 0.000000000 |
| O | -2.796287507 | -0.348823108 | 0.000000000 |
| C | -0.485940141 | 0.225841057  | 0.000000000 |
| C | -0.017124795 | -1.089634265 | 0.000000000 |
| C | 0.412441069  | 1.290868071  | 0.000000000 |
| C | 1.347927865  | -1.332430699 | 0.000000000 |
| C | 1.781527033  | 1.046811259  | 0.000000000 |
| C | 2.246137206  | -0.264403258 | 0.000000000 |
| H | -0.736787312 | -1.900726795 | 0.000000000 |
| H | 0.037527391  | 2.310351708  | 0.000000000 |
| H | 1.718942960  | -2.350912692 | 0.000000000 |
| H | 2.482858877  | 1.873070052  | 0.000000000 |
| H | 3.313078605  | -0.457971847 | 0.000000000 |

**2-Br:** E= -2918.980694

|    |              |              |             |
|----|--------------|--------------|-------------|
| C  | 3.745450443  | -0.335364032 | 0.000000000 |
| H  | 4.144501452  | -1.369082526 | 0.000000000 |
| O  | 4.491085966  | 0.608122261  | 0.000000000 |
| C  | 2.265745153  | -0.230048384 | 0.000000000 |
| C  | 1.650410050  | 1.023057992  | 0.000000000 |
| C  | 1.490532005  | -1.386823577 | 0.000000000 |
| C  | 0.268344864  | 1.119983405  | 0.000000000 |
| C  | 0.103123708  | -1.305252130 | 0.000000000 |
| C  | -0.490854053 | -0.049133179 | 0.000000000 |
| H  | 2.271075383  | 1.912159860  | 0.000000000 |
| H  | 1.971937922  | -2.360270067 | 0.000000000 |
| H  | -0.221937490 | 2.085355956  | 0.000000000 |
| H  | -0.508583145 | -2.198355407 | 0.000000000 |
| Br | -2.381506596 | 0.078326497  | 0.000000000 |

**2-CF3:** E= -682.444151

|   |              |              |              |
|---|--------------|--------------|--------------|
| C | 3.536552000  | 0.314159000  | 0.010020000  |
| H | 3.941952000  | 1.344941000  | 0.016096000  |
| O | 4.273011000  | -0.635043000 | 0.012512000  |
| C | 2.052268000  | 0.215609000  | -0.001093000 |
| C | 1.435179000  | -1.037130000 | -0.010309000 |
| C | 1.286715000  | 1.377498000  | -0.006820000 |
| C | 0.053603000  | -1.121814000 | -0.024269000 |
| C | -0.101691000 | 1.298665000  | -0.019456000 |
| C | -0.706526000 | 0.048566000  | -0.030083000 |
| H | 2.053980000  | -1.927086000 | -0.008698000 |
| H | 1.775365000  | 2.346938000  | -0.002813000 |
| H | -0.440378000 | -2.086580000 | -0.037281000 |
| H | -0.706948000 | 2.196619000  | -0.028503000 |
| C | -2.205875000 | -0.066021000 | 0.000315000  |
| F | -2.808304000 | 1.066854000  | -0.380143000 |
| F | -2.643655000 | -1.044210000 | -0.804323000 |
| F | -2.649087000 | -0.352831000 | 1.234606000  |

**2-CN:** E= -437.636378

|   |              |              |              |
|---|--------------|--------------|--------------|
| C | -2.793125000 | 0.333141000  | 0.000055000  |
| H | -3.180225000 | 1.370722000  | 0.000102000  |
| O | -3.544993000 | -0.603593000 | 0.000084000  |
| C | -1.310300000 | 0.207282000  | 0.000028000  |
| C | -0.718175000 | -1.056988000 | 0.000017000  |
| C | -0.522210000 | 1.355738000  | 0.000009000  |
| C | 0.660858000  | -1.172184000 | -0.000012000 |
| C | 0.861818000  | 1.251731000  | -0.000023000 |
| C | 1.449307000  | -0.014744000 | -0.000032000 |
| H | -1.354659000 | -1.934420000 | 0.000030000  |
| H | -0.992347000 | 2.334228000  | 0.000017000  |
| H | 1.138343000  | -2.144438000 | -0.000020000 |
| H | 1.487991000  | 2.135372000  | -0.000039000 |
| C | 2.882198000  | -0.131376000 | -0.000064000 |
| N | 4.028374000  | -0.224045000 | -0.000089000 |

**2-NO2:** E= -549.882421

|   |              |              |             |
|---|--------------|--------------|-------------|
| C | -3.208416371 | 0.365426580  | 0.000000000 |
| H | -3.595666821 | 1.402697583  | 0.000000000 |
| O | -3.958716516 | -0.571914742 | 0.000000000 |
| C | -1.724056596 | 0.238553448  | 0.000000000 |
| C | -1.134632091 | -1.027005811 | 0.000000000 |
| C | -0.936726014 | 1.387715878  | 0.000000000 |
| C | 0.245522056  | -1.146366183 | 0.000000000 |
| C | 0.448682906  | 1.285562652  | 0.000000000 |
| C | 1.005627168  | 0.016915621  | 0.000000000 |
| H | -1.771925973 | -1.903598244 | 0.000000000 |
| H | -1.406331044 | 2.366187232  | 0.000000000 |
| H | 0.737832117  | -2.109553503 | 0.000000000 |
| H | 1.089847876  | 2.156579791  | 0.000000000 |
| N | 2.483335217  | -0.103962263 | 0.000000000 |
| O | 2.949907605  | -1.220632497 | 0.000000000 |
| O | 3.125645994  | 0.922200856  | 0.000000000 |

**2-RC-NMe2:** E= -572.127809

|   |              |              |              |
|---|--------------|--------------|--------------|
| C | -2.413873000 | -1.543132000 | 0.000839000  |
| H | -3.198870000 | -0.767388000 | 0.038992000  |
| O | -2.684793000 | -2.725277000 | 0.006489000  |
| C | -3.786673000 | 2.001570000  | 0.124056000  |
| N | -4.630175000 | 2.806791000  | 0.198058000  |
| C | -1.029209000 | -1.024317000 | -0.055480000 |
| C | 0.069145000  | -1.890255000 | -0.115149000 |
| C | -0.820244000 | 0.351524000  | -0.056098000 |
| C | 1.353070000  | -1.387630000 | -0.168794000 |
| C | 0.476604000  | 0.859979000  | -0.102263000 |
| C | 1.581464000  | 0.003975000  | -0.155279000 |
| H | -0.109027000 | -2.960523000 | -0.133741000 |
| H | -1.683624000 | 1.019407000  | -0.008719000 |
| H | 2.192713000  | -2.067564000 | -0.259025000 |

|   |             |              |              |
|---|-------------|--------------|--------------|
| H | 0.606841000 | 1.934354000  | -0.084380000 |
| N | 2.908056000 | 0.484087000  | -0.237256000 |
| C | 3.070565000 | 1.916714000  | -0.377086000 |
| H | 4.121768000 | 2.130026000  | -0.579955000 |
| H | 2.480778000 | 2.282362000  | -1.217418000 |
| H | 2.775536000 | 2.473010000  | 0.526636000  |
| C | 3.842013000 | -0.064506000 | 0.734471000  |
| H | 4.862221000 | 0.184137000  | 0.434223000  |
| H | 3.666336000 | 0.341975000  | 1.742905000  |
| H | 3.761329000 | -1.147246000 | 0.787654000  |

**2-RC-tBu:** E= -595.364292

|   |              |              |              |
|---|--------------|--------------|--------------|
| C | 2.917371000  | -1.262465000 | 0.000019000  |
| H | 3.645068000  | -0.431491000 | 0.000015000  |
| O | 3.272937000  | -2.421015000 | -0.000123000 |
| C | 4.389472000  | 2.049294000  | 0.000001000  |
| N | 3.530449000  | 2.844109000  | -0.000102000 |
| C | 1.486178000  | -0.859154000 | 0.000085000  |
| C | 0.471927000  | -1.821894000 | 0.000036000  |
| C | 1.155414000  | 0.491901000  | 0.000159000  |
| C | -0.854429000 | -1.430446000 | 0.000048000  |
| C | -0.187347000 | 0.874246000  | 0.000173000  |
| C | -1.212172000 | -0.070251000 | 0.000134000  |
| H | 0.747355000  | -2.871451000 | -0.000019000 |
| H | 1.940543000  | 1.247766000  | 0.000170000  |
| H | -1.627964000 | -2.192638000 | 0.000014000  |
| H | -0.409413000 | 1.934220000  | 0.000224000  |
| C | -2.693916000 | 0.313843000  | 0.000009000  |
| C | -3.371627000 | -0.262255000 | 1.253961000  |
| H | -2.902379000 | 0.130082000  | 2.159591000  |
| H | -4.432516000 | 0.007435000  | 1.271716000  |
| H | -3.301585000 | -1.351534000 | 1.287371000  |
| C | -3.371321000 | -0.262257000 | -1.254165000 |
| H | -4.432104000 | 0.007813000  | -1.272337000 |
| H | -2.901542000 | 0.129788000  | -2.159634000 |
| H | -3.301660000 | -1.351567000 | -1.287347000 |
| C | -2.900750000 | 1.830930000  | -0.000085000 |
| H | -3.971107000 | 2.055869000  | -0.000310000 |
| H | -2.461285000 | 2.298109000  | 0.884409000  |
| H | -2.460858000 | 2.298000000  | -0.884413000 |

**2-RC-Me:** E= -477.542357

|   |              |              |              |
|---|--------------|--------------|--------------|
| C | -1.615831000 | 1.485008000  | 0.003100000  |
| H | -2.497873000 | 0.820064000  | 0.003898000  |
| O | -1.728240000 | 2.691743000  | 0.005111000  |
| C | -3.742736000 | -1.450530000 | 0.003458000  |
| N | -3.069362000 | -2.407703000 | -0.000861000 |
| C | -0.297132000 | 0.797900000  | -0.000094000 |
| C | 0.890301000  | 1.536453000  | -0.002626000 |
| C | -0.253331000 | -0.595084000 | -0.003381000 |

|   |              |              |              |
|---|--------------|--------------|--------------|
| C | 2.111120000  | 0.883431000  | -0.007747000 |
| C | 0.982416000  | -1.240056000 | -0.008383000 |
| C | 2.172609000  | -0.517202000 | -0.008005000 |
| H | 0.830532000  | 2.619876000  | -0.003627000 |
| H | -1.178188000 | -1.171660000 | -0.004246000 |
| H | 3.034821000  | 1.456603000  | -0.012645000 |
| H | 1.010343000  | -2.325559000 | -0.013468000 |
| C | 3.508351000  | -1.215333000 | 0.011895000  |
| H | 3.958951000  | -1.167219000 | 1.007857000  |
| H | 3.408608000  | -2.268387000 | -0.255925000 |
| H | 4.209661000  | -0.751257000 | -0.686010000 |

**2-RC-H:** E= -438.264978

|   |              |              |              |
|---|--------------|--------------|--------------|
| C | 0.662382000  | 1.643986000  | -0.000269000 |
| H | 1.718219000  | 1.319800000  | 0.000026000  |
| O | 0.355681000  | 2.815925000  | -0.000451000 |
| C | 3.674840000  | -0.336069000 | 0.002091000  |
| N | 3.357720000  | -1.462573000 | -0.001111000 |
| C | -0.346557000 | 0.548052000  | -0.000191000 |
| C | -1.712171000 | 0.846916000  | 0.000271000  |
| C | 0.089767000  | -0.776887000 | -0.000486000 |
| C | -2.644160000 | -0.179697000 | 0.000466000  |
| C | -0.853099000 | -1.803951000 | -0.000257000 |
| C | -2.211666000 | -1.508363000 | 0.000222000  |
| H | -2.016852000 | 1.888188000  | 0.000494000  |
| H | 1.156574000  | -1.000106000 | -0.000943000 |
| H | -3.705769000 | 0.045621000  | 0.000802000  |
| H | -0.516065000 | -2.834704000 | -0.000481000 |
| H | -2.941612000 | -2.312115000 | 0.000406000  |

**2-RC-Br:** E= -3011.853759

|    |              |              |              |
|----|--------------|--------------|--------------|
| C  | 2.946372000  | -1.201193000 | -0.000699000 |
| H  | 3.661113000  | -0.359636000 | 0.001639000  |
| O  | 3.314065000  | -2.354644000 | 0.001227000  |
| C  | 4.380031000  | 2.063802000  | -0.000839000 |
| N  | 3.495455000  | 2.829969000  | -0.000715000 |
| C  | 1.503857000  | -0.823309000 | -0.000404000 |
| C  | 0.518917000  | -1.813494000 | -0.000478000 |
| C  | 1.149726000  | 0.524753000  | -0.000112000 |
| C  | -0.823153000 | -1.466278000 | -0.000271000 |
| C  | -0.197465000 | 0.885374000  | 0.000086000  |
| C  | -1.159057000 | -0.113422000 | 0.000011000  |
| H  | 0.824224000  | -2.854417000 | -0.000718000 |
| H  | 1.922130000  | 1.294636000  | -0.000069000 |
| H  | -1.598566000 | -2.222156000 | -0.000328000 |
| H  | -0.481820000 | 1.930064000  | 0.000299000  |
| Br | -3.006376000 | 0.368613000  | 0.000303000  |

**2-RC-CF3:** E= -775.319997

|   |              |              |              |
|---|--------------|--------------|--------------|
| C | -2.873454000 | -1.224591000 | 0.007446000  |
| H | -3.605078000 | -0.397877000 | 0.011832000  |
| O | -3.214087000 | -2.385586000 | 0.010207000  |
| C | -4.383924000 | 1.954392000  | 0.011719000  |
| N | -3.527345000 | 2.751396000  | -0.006042000 |
| C | -1.434549000 | -0.819914000 | -0.002063000 |
| C | -0.434566000 | -1.797600000 | -0.008293000 |
| C | -1.106087000 | 0.533641000  | -0.008685000 |
| C | 0.896946000  | -1.423656000 | -0.019831000 |
| C | 0.236895000  | 0.910822000  | -0.018661000 |
| C | 1.224529000  | -0.064332000 | -0.026766000 |
| H | -0.725985000 | -2.842067000 | -0.005773000 |
| H | -1.893038000 | 1.288310000  | -0.006580000 |
| H | 1.683931000  | -2.169843000 | -0.029986000 |
| H | 0.501361000  | 1.961443000  | -0.026916000 |
| C | 2.673855000  | 0.314736000  | 0.000218000  |
| F | 3.409772000  | -0.436170000 | -0.843152000 |
| F | 2.886522000  | 1.595081000  | -0.332828000 |
| F | 3.219823000  | 0.139306000  | 1.221264000  |

**2-RC-CN:** E= -530.514783

|   |              |              |              |
|---|--------------|--------------|--------------|
| C | -2.049696000 | 1.289189000  | -0.000654000 |
| H | -2.840473000 | 0.518802000  | -0.001562000 |
| O | -2.300845000 | 2.472295000  | -0.000015000 |
| C | -3.758319000 | -1.776097000 | 0.001429000  |
| N | -2.972630000 | -2.643150000 | 0.000309000  |
| C | -0.643558000 | 0.778758000  | -0.000410000 |
| C | 0.424202000  | 1.681161000  | 0.000525000  |
| C | -0.416024000 | -0.597204000 | -0.001115000 |
| C | 1.725450000  | 1.213960000  | 0.000725000  |
| C | 0.892002000  | -1.071749000 | -0.000957000 |
| C | 1.956824000  | -0.169498000 | -0.000033000 |
| H | 0.209381000  | 2.743986000  | 0.001065000  |
| H | -1.256813000 | -1.291974000 | -0.001849000 |
| H | 2.566731000  | 1.897443000  | 0.001440000  |
| H | 1.084266000  | -2.138209000 | -0.001542000 |
| C | 3.311212000  | -0.651899000 | 0.000164000  |
| N | 4.399932000  | -1.026583000 | 0.000337000  |

**2-RC-NO2:** E= -642.762702

|   |              |              |              |
|---|--------------|--------------|--------------|
| C | 2.401315000  | -1.221577000 | -0.000845000 |
| H | 3.156811000  | -0.418517000 | -0.001734000 |
| O | 2.691272000  | -2.395363000 | 0.000475000  |
| C | 4.700746000  | 2.124810000  | 0.004838000  |
| N | 3.552781000  | 1.894148000  | -0.002412000 |
| C | 0.973942000  | -0.764665000 | -0.000939000 |
| C | -0.056745000 | -1.708643000 | -0.000031000 |
| C | 0.696304000  | 0.602874000  | -0.001605000 |
| C | -1.377544000 | -1.295471000 | 0.000356000  |
| C | -0.629853000 | 1.028755000  | -0.001235000 |

|   |              |              |              |
|---|--------------|--------------|--------------|
| C | -1.634310000 | 0.072997000  | -0.000200000 |
| H | 0.198865000  | -2.762220000 | 0.000479000  |
| H | 1.530425000  | 1.307603000  | -0.001998000 |
| H | -2.200528000 | -1.997236000 | 0.001066000  |
| H | -0.884315000 | 2.080165000  | -0.001553000 |
| N | -3.042112000 | 0.519372000  | 0.000399000  |
| O | -3.261244000 | 1.712118000  | -0.000246000 |
| O | -3.907411000 | -0.334119000 | 0.001744000  |

**2-TS-NMe2:** E= -572.113393 (i = -175 cm-1)

|   |              |              |              |
|---|--------------|--------------|--------------|
| C | -2.690967000 | -0.658170000 | 0.585222000  |
| H | -3.013310000 | -0.200270000 | 1.538036000  |
| O | -3.208012000 | -1.709374000 | 0.194550000  |
| C | -3.430268000 | 1.026949000  | -0.368903000 |
| N | -3.946984000 | 1.967670000  | -0.817711000 |
| C | -1.221549000 | -0.388785000 | 0.300558000  |
| C | -0.485795000 | -1.315470000 | -0.432955000 |
| C | -0.566075000 | 0.724919000  | 0.806902000  |
| C | 0.869626000  | -1.125154000 | -0.663542000 |
| C | 0.797691000  | 0.915712000  | 0.600762000  |
| C | 1.536591000  | -0.011150000 | -0.142024000 |
| H | -1.011178000 | -2.178514000 | -0.827893000 |
| H | -1.141630000 | 1.470000000  | 1.350037000  |
| H | 1.422541000  | -1.832248000 | -1.274766000 |
| H | 1.274368000  | 1.796677000  | 1.014577000  |
| N | 2.932467000  | 0.141154000  | -0.404611000 |
| C | 3.493240000  | 1.439354000  | -0.100534000 |
| H | 4.509592000  | 1.486355000  | -0.498928000 |
| H | 2.901557000  | 2.222409000  | -0.575616000 |
| H | 3.545283000  | 1.647952000  | 0.982007000  |
| C | 3.755158000  | -0.922742000 | 0.150077000  |
| H | 4.767491000  | -0.850166000 | -0.256284000 |
| H | 3.815660000  | -0.864668000 | 1.250106000  |
| H | 3.349430000  | -1.897083000 | -0.114797000 |

**2-TS-tBu:** E= -595.350849 (i = -165 cm-1)

|   |              |              |              |
|---|--------------|--------------|--------------|
| C | -3.025801000 | -0.652964000 | 0.542432000  |
| H | -3.389896000 | -0.189143000 | 1.477012000  |
| O | -3.548967000 | -1.684384000 | 0.114252000  |
| C | -3.661775000 | 1.070722000  | -0.443326000 |
| N | -4.131862000 | 2.021954000  | -0.920435000 |
| C | -1.538633000 | -0.413397000 | 0.335178000  |
| C | -0.782343000 | -1.353642000 | -0.345861000 |
| C | -0.889844000 | 0.693134000  | 0.881822000  |
| C | 0.596573000  | -1.190716000 | -0.493808000 |
| C | 0.479350000  | 0.851075000  | 0.742467000  |
| C | 1.256946000  | -0.088584000 | 0.047216000  |
| H | -1.296101000 | -2.216011000 | -0.757369000 |
| H | -1.481937000 | 1.449217000  | 1.390750000  |
| H | 1.149649000  | -1.946892000 | -1.039748000 |

|   |             |              |              |
|---|-------------|--------------|--------------|
| H | 0.950725000 | 1.730221000  | 1.173006000  |
| C | 2.765280000 | 0.133728000  | -0.092045000 |
| C | 3.024247000 | 1.454459000  | -0.835070000 |
| H | 2.573455000 | 1.430001000  | -1.830208000 |
| H | 2.597923000 | 2.305872000  | -0.300793000 |
| H | 4.099908000 | 1.628983000  | -0.946219000 |
| C | 3.449314000 | -0.991996000 | -0.873121000 |
| H | 3.055329000 | -1.073000000 | -1.889277000 |
| H | 4.522469000 | -0.792121000 | -0.945903000 |
| H | 3.322085000 | -1.959081000 | -0.379778000 |
| C | 3.408594000 | 0.203979000  | 1.302448000  |
| H | 4.489023000 | 0.364216000  | 1.220370000  |
| H | 2.991858000 | 1.020333000  | 1.895935000  |
| H | 3.238824000 | -0.725989000 | 1.851251000  |

**2-TS-Me:** E= -477.528568 (i = -169 cm-1)

|   |              |              |              |
|---|--------------|--------------|--------------|
| C | 1.909857000  | 0.694523000  | 0.578608000  |
| H | 2.273488000  | 0.234349000  | 1.515290000  |
| O | 2.373080000  | 1.771483000  | 0.194121000  |
| C | 2.700157000  | -0.948331000 | -0.422919000 |
| N | 3.255153000  | -1.849220000 | -0.906437000 |
| C | 0.449350000  | 0.359384000  | 0.316306000  |
| C | -0.346376000 | 1.268476000  | -0.366276000 |
| C | -0.135407000 | -0.803608000 | 0.816143000  |
| C | -1.704007000 | 1.014467000  | -0.560602000 |
| C | -1.486978000 | -1.051885000 | 0.630093000  |
| C | -2.294671000 | -0.145669000 | -0.066927000 |
| H | 0.122635000  | 2.174050000  | -0.736101000 |
| H | 0.494288000  | -1.527764000 | 1.326390000  |
| H | -2.314447000 | 1.733259000  | -1.102115000 |
| H | -1.927748000 | -1.967064000 | 1.018767000  |
| C | -3.757426000 | -0.439788000 | -0.288696000 |
| H | -4.255439000 | -0.717593000 | 0.644423000  |
| H | -4.277343000 | 0.427939000  | -0.700321000 |
| H | -3.893141000 | -1.269909000 | -0.988617000 |

**2-TS-H:** E= -438.251946 (i = -163 cm-1)

|   |              |              |              |
|---|--------------|--------------|--------------|
| C | 1.347130000  | 0.761737000  | 0.638689000  |
| H | 1.716411000  | 0.299243000  | 1.571547000  |
| O | 1.716071000  | 1.892401000  | 0.314957000  |
| C | 2.347247000  | -0.762605000 | -0.387361000 |
| N | 3.015202000  | -1.582994000 | -0.871545000 |
| C | -0.057137000 | 0.290649000  | 0.290844000  |
| C | -0.900456000 | 1.137813000  | -0.418585000 |
| C | -0.542199000 | -0.937463000 | 0.736861000  |
| C | -2.213090000 | 0.758409000  | -0.692336000 |
| C | -1.851850000 | -1.317210000 | 0.474128000  |
| C | -2.694159000 | -0.468201000 | -0.245135000 |
| H | -0.500159000 | 2.091944000  | -0.744201000 |
| H | 0.134133000  | -1.605743000 | 1.263232000  |

|   |              |              |              |
|---|--------------|--------------|--------------|
| H | -2.863894000 | 1.422712000  | -1.253207000 |
| H | -2.217788000 | -2.279798000 | 0.818019000  |
| H | -3.716613000 | -0.765390000 | -0.456867000 |

**2-TS-Br:** E= -3011.842388 (i = -143 cm<sup>-1</sup>)

|    |              |              |              |
|----|--------------|--------------|--------------|
| C  | 3.031735000  | 0.672344000  | 0.537531000  |
| H  | 3.420883000  | 0.195832000  | 1.453149000  |
| O  | 3.540689000  | 1.700741000  | 0.098894000  |
| C  | 3.668947000  | -1.101502000 | -0.470722000 |
| N  | 4.124315000  | -2.071622000 | -0.924224000 |
| C  | 1.549021000  | 0.411578000  | 0.333362000  |
| C  | 0.786256000  | 1.350334000  | -0.349833000 |
| C  | 0.922217000  | -0.703961000 | 0.884220000  |
| C  | -0.589344000 | 1.182643000  | -0.496643000 |
| C  | -0.448104000 | -0.887915000 | 0.758320000  |
| C  | -1.186903000 | 0.064981000  | 0.064740000  |
| H  | 1.294402000  | 2.214880000  | -0.762887000 |
| H  | 1.528686000  | -1.452676000 | 1.385713000  |
| H  | -1.186671000 | 1.910301000  | -1.033180000 |
| H  | -0.936490000 | -1.759014000 | 1.178101000  |
| Br | -3.077700000 | -0.175569000 | -0.117381000 |

**2-TS-CF3:** E= -775.310599 (i = -124 cm<sup>-1</sup>)

|   |              |              |              |
|---|--------------|--------------|--------------|
| C | -2.973397000 | -0.698324000 | 0.546513000  |
| H | -3.373290000 | -0.207296000 | 1.448640000  |
| O | -3.486336000 | -1.717928000 | 0.101514000  |
| C | -3.587890000 | 1.122866000  | -0.477982000 |
| N | -4.027375000 | 2.107178000  | -0.916965000 |
| C | -1.493491000 | -0.432527000 | 0.337868000  |
| C | -0.733934000 | -1.360776000 | -0.363992000 |
| C | -0.867359000 | 0.673083000  | 0.913971000  |
| C | 0.639383000  | -1.187073000 | -0.504676000 |
| C | 0.500060000  | 0.850955000  | 0.790366000  |
| C | 1.254575000  | -0.086044000 | 0.080290000  |
| H | -1.244315000 | -2.216884000 | -0.790501000 |
| H | -1.475946000 | 1.408643000  | 1.431085000  |
| H | 1.232322000  | -1.910428000 | -1.052940000 |
| H | 0.987504000  | 1.711153000  | 1.236442000  |
| C | 2.720385000  | 0.140159000  | -0.090484000 |
| F | 3.001479000  | 1.021991000  | -1.073464000 |
| F | 3.297845000  | 0.638592000  | 1.021594000  |
| F | 3.390237000  | -0.985687000 | -0.398943000 |

**2-TS-CN:** E= -530.506392 (i = -115 cm<sup>-1</sup>)

|   |             |              |              |
|---|-------------|--------------|--------------|
| C | 2.190176000 | 0.725881000  | 0.565862000  |
| H | 2.598473000 | 0.232084000  | 1.462028000  |
| O | 2.675193000 | 1.763319000  | 0.135962000  |
| C | 2.869165000 | -1.088043000 | -0.478316000 |
| N | 3.329361000 | -2.062090000 | -0.919218000 |

|   |              |              |              |
|---|--------------|--------------|--------------|
| C | 0.727327000  | 0.406398000  | 0.325109000  |
| C | -0.045643000 | 1.299078000  | -0.410916000 |
| C | 0.127794000  | -0.715012000 | 0.899124000  |
| C | -1.404309000 | 1.075042000  | -0.585911000 |
| C | -1.226874000 | -0.946964000 | 0.742704000  |
| C | -2.000367000 | -0.047212000 | -0.004255000 |
| H | 0.446474000  | 2.165801000  | -0.837386000 |
| H | 0.750091000  | -1.422462000 | 1.438459000  |
| H | -2.011894000 | 1.763256000  | -1.162958000 |
| H | -1.696668000 | -1.820367000 | 1.180407000  |
| C | -3.407560000 | -0.275877000 | -0.166971000 |
| N | -4.538829000 | -0.455712000 | -0.293184000 |

**2-TS-NO2:** E= -642.754895 (i = -101 cm-1)

|   |              |              |              |
|---|--------------|--------------|--------------|
| C | -2.594877000 | -0.668664000 | 0.635415000  |
| H | -3.014482000 | -0.070663000 | 1.459183000  |
| O | -3.094413000 | -1.731353000 | 0.300630000  |
| C | -3.211336000 | 1.074885000  | -0.614864000 |
| N | -3.637513000 | 2.014149000  | -1.154768000 |
| C | -1.127701000 | -0.392984000 | 0.378199000  |
| C | -0.366495000 | -1.353548000 | -0.282654000 |
| C | -0.513566000 | 0.760067000  | 0.870304000  |
| C | 0.996489000  | -1.167849000 | -0.467824000 |
| C | 0.845521000  | 0.959641000  | 0.708292000  |
| C | 1.582429000  | -0.014622000 | 0.037854000  |
| H | -0.870210000 | -2.242315000 | -0.644508000 |
| H | -1.127135000 | 1.516866000  | 1.348464000  |
| H | 1.607097000  | -1.897013000 | -0.983704000 |
| H | 1.340534000  | 1.848404000  | 1.075864000  |
| N | 3.025287000  | 0.182409000  | -0.135287000 |
| O | 3.528118000  | 1.183398000  | 0.339329000  |
| O | 3.652169000  | -0.666138000 | -0.741615000 |
